1 Anti-Asialo GM1 treatment during secondary *Toxoplasma gondii* infection is lethal and depletes T  
2 cells

3

4 Daria L. Ivanova,<sup>a</sup> Steve L. Denton,<sup>a</sup> Jason P. Gigley,<sup>a#</sup>

5

6 <sup>a</sup>Department of Molecular Biology, University of Wyoming, Laramie, Wyoming, USA

7

8 Running Head: Anti-Asialo GM1 depletes T cells during secondary *T. gondii* infection

9

10 #Address correspondence and reprint requests to: Dr. Jason P. Gigley, 1000 E. University Ave.

11 Laramie, WY 82071, USA; email: [jgigley@uwyo.edu](mailto:jgigley@uwyo.edu)

12 ORCID: 0000-0001-8805-4561 (J.P.G.)

13 This work is supported by grants from the American Heart Association AHA 17GRNT33700199 and

14 University of Wyoming INBRE P20 GM103432 DRPP awarded to JPG. DLI is a University of

15 Wyoming INBRE P20 GM103432 Graduate Assistantship recipient. SLD is a University of

16 Wyoming INBRE P20 GM103432 supported undergraduate fellow. This project is supported in part

17 by a grant from the National Institute of General Medical Sciences (2P20GM103432) from the

18 National Institutes of Health. The content is solely the responsibility of the authors and does not

19 necessarily represent the official views of the National Institutes of Health

20

21 **Abstract**

22

23 Using vaccine challenge model of *T. gondii* infection, we found that treatments with two commonly  
24 used for NK cell depletion antibodies resulted in different survival outcomes during secondary  
25 infection. Anti-ASGM1 resulted in 100% death and greater parasite burden at the site of infection  
26 than anti-NK1.1. Anti-NK1.1 treatment resulted in increased parasite burdens, but animals did not  
27 die. Further we found that anti-ASGM1 treatment depleted T cells. CD8<sup>+</sup> T cells were more  
28 susceptible than CD4<sup>+</sup> T cells to the treatment. ASGM1 was expressed on a higher percentage of  
29 CD8<sup>+</sup> T cells than CD4<sup>+</sup> T cells and CD8<sup>+</sup> T cells. In *T. gondii*-immunized animals ASGM1 was  
30 enriched on effector memory (Tem) and central memory (Tcm) CD8<sup>+</sup> T cells. However, Tem were  
31 more susceptible to the treatment. After secondary infection, Tem, Tcm, effector (Tef) and naïve (Tn)  
32 CD8<sup>+</sup> T cells were positive for ASGM1. Anti-ASGM1 treatment during reinfection resulted in  
33 greater depletion of activated IFN $\gamma$ <sup>+</sup>, Granzyme B<sup>+</sup>, Tem and Tef than Tcm and Tn CD8<sup>+</sup> T cells.  
34 Anti-ASGM1 also depleted IFN $\gamma$ <sup>+</sup> CD4<sup>+</sup> T cells. Recombinant IFN $\gamma$  supplementation prolonged  
35 survival of anti-ASGM1 treated mice, demonstrating that this antibody eliminated IFN $\gamma$ -producing T  
36 and NK cells important for control of the parasite. These results highlight that anti-ASGM1 antibody  
37 is not an optimal choice for targeting only NK cells and more precise approaches should be used.  
38 This study uncovers ASGM1 as a marker of activated effector T cells and the potential importance of  
39 changes in sialylation in lipid rafts for T cell activation during *T. gondii* infection.

40

## 41 **Introduction**

42 *T. gondii* is an obligate intracellular protozoan that infects ~25-30% of people worldwide  
43 (Flegr et al., 2014, Jones and Dubey, 2012). Infection with the parasite in people is one of the leading  
44 causes of foodborne illnesses in the U.S. resulting in hospitalization (Scallan et al., 2011). Despite  
45 induction of a robust CD8<sup>+</sup> T cell response, the parasite does not get completely cleared and  
46 establishes a persistent infection in the brain and muscles of the host (Harker et al., 2015, Wohlfert et  
47 al., 2017). Recent studies suggest that infection with the parasite correlates with schizophrenia,  
48 depression, behavioral changes, and neurodegenerative disorders (Lang et al., 2018, Donley et al.,  
49 2016). In the patients with weakened immune system, the *T. gondii* parasites can cause toxoplasmic  
50 encephalitis and death (Luft and Remington, 1992, Kodym et al., 2015). Currently, there are no  
51 vaccines or treatments that completely clear the infection (Radke et al., 2018). Understanding how  
52 the immune system functions in response to the parasite is paramount for the development of novel  
53 therapeutic approaches to treat this infection.

54 *T. gondii* infection induces a robust Th1 response that provides long-term protection through  
55 the production of IFN $\gamma$  by CD8<sup>+</sup> T cells (Suzuki et al., 1988, Gazzinelli et al., 1991). However, IFN $\gamma$   
56 is also produced early during infection by innate immune cells, including NK cells, ILC1 and  
57 neutrophils (Sher et al., 1993, Klose et al., 2014, Sturge et al., 2013). The approaches taken to define  
58 the role of different innate immune cell populations have included cell depletion studies *in vivo* using  
59 antibodies to the different cell populations and animals with mutations or genetic deficiencies that  
60 result in the absence of the cell of interest. REF These approaches of course are not perfect and have  
61 off target effects making it difficult to fully understand the role of different cell types in a disease.  
62 This situation has become more apparent for studies investigating NK cells and depends upon the  
63 disease model being studied (Nishikado et al., 2011). NK cells are usually depleted using NK cell  
64 specific antibodies *in vivo* (Victorino et al., 2015). However, in some disease models, antibody  
65 depletion of NK cells either targeted NK cells alone, or targeted additional subsets of immune cells

66 (Nishikado et al., 2011). The conventional approach to target NK cells *in vivo* utilizes antibodies  
67 against asialo GM1 (ASGM1) or the surface marker NK1.1 (Young et al., 1980). Anti-ASGM1  
68 antibody reacts with a glycosphingolipid expressed on the surface NK cells, basophils, and on some  
69 subsets of  $\gamma\delta$ T, NKT, CD8 T cells and macrophages (Nishikado et al., 2011, Slifka et al., 2000,  
70 Wiltrout et al., 1985, Kasai et al., 1980). In contrast, anti-NK1.1 targets a glycoprotein expressed on  
71 NK cells and some subsets of  $\gamma\delta$ T, NKT, and CD8+ T cells (Slifka et al., 2000). Anti-NK1.1  
72 depletion of NK cells is limited in specific mouse strains due to an allelic variation in the NKR-P1  
73 gene that encodes NK1.1. REF Therefore, anti-NK1.1 can only be used in C57BL/6, SJL, and NZB  
74 and not in other strains (BALBC etc.) (Mesci et al., 2006, Carlyle et al., 2006). Anti-ASGM1 is an  
75 alternative and is very commonly used for NK cell depletion because it effectively depletes NK cells  
76 *in vivo* in many mouse strains and other species. REF Although there are mouse strains with genetic  
77 alterations that result in NK cell deficiencies without the use of antibodies, they have additional  
78 defects that make interpretation of studies difficult (Jessen et al., 2011, Eckelhart et al., 2011).  
79 Therefore, when choosing between the use of antibodies for NK cell depletions and genetically  
80 modified NK cell deficient mice, many investigators lean towards the use of the antibodies due to  
81 their availability, ease of use, and the ability to have a temporal control of cell ablation *in vivo*.

82 Many studies have demonstrated that NK cells are essential for protection against *T. gondii*  
83 infection by using anti-ASGM1 or anti-NK1.1 treatments (Denkers et al., 1993, Gazzinelli et al.,  
84 1993, Goldszmid et al., 2012, Askenase et al., 2015). While there is no doubt about NK cell  
85 importance, whether these experimental approaches had additional effects on the immune response to  
86 the parasite is not clear. In this study we found that anti-NK1.1 and anti-ASGM1 significantly  
87 differed in their impact on mouse survival and parasite burdens when administered during lethal *T.*  
88 *gondii* challenge of mice vaccinated with the attenuated type I RH strain *cps1-1* (CPS {Fox, 2002  
89 #390}). The parasite burdens were higher and the survival rate was reduced after the treatment with  
90 anti-ASGM1 as compared to anti-NK1.1. We further explored the reason for this difference and

91 discovered that while both antibodies depleted NK cells, anti-ASGM1 also significantly depleted  
92 CD8<sup>+</sup> and CD4<sup>+</sup> T cells both in spleen and the site of challenge infection. Anti-NK1.1 treatment did  
93 not have as dramatic of an effect. Interestingly, CD8<sup>+</sup> T cells were more affected by anti-ASGM1  
94 treatment than CD4<sup>+</sup> T cells. ASGM1 was expressed on the surface of CD4<sup>+</sup> and CD8<sup>+</sup> T cells in  
95 CPS-vaccinated animals. Further dissection of whether ASGM1 was expressed more on memory T  
96 cells after vaccination revealed that effector memory (Tem, CD62L-CD44<sup>+</sup>) and central memory  
97 (Tcm, CD62L+CD44<sup>+</sup>) CD8<sup>+</sup> T cells both had higher concentrations of ASGM1 on their surface.  
98 However, during secondary challenge of vaccinated mice, all T cell subsets, including memory (Tem  
99 and Tcm), effector (Tef) and naïve (Tn) cells increased ASGM1 on their surface. Interestingly, anti-  
100 ASGM1 treatment during RH challenge of CPS-vaccinated animals effectively eliminated most Tem  
101 and Tef (CD62L-) CD8<sup>+</sup> T cells leading to an increase in naïve CD8<sup>+</sup> T cells. Anti-ASGM1  
102 significantly reduced the frequency and number of activated IFN $\gamma$ <sup>+</sup>, Granzyme B<sup>+</sup> and  
103 polyfunctional IFN $\gamma$ <sup>+</sup>GranzymeB<sup>+</sup> CD8<sup>+</sup> T cells and IFN $\gamma$ <sup>+</sup> CD4<sup>+</sup> T cells in RH challenged  
104 animals. Recombinant IFN $\gamma$  supplementation of depleted animals prolonged their survival. These  
105 studies demonstrate that NK cell depletion with anti-ASGM1 during *T. gondii* infection also  
106 eliminates CD8<sup>+</sup> and CD4<sup>+</sup> T cells in *T. gondii* vaccinated animals and that ASGM1 may be  
107 important in the activation of T cells important in control of parasite infection.

108

109

110

111

112

113

114

115

## 116 **Results**

### 117 ***Anti-NK1.1 and anti-ASGM1 have different effects on control of T. gondii infection***

118       The importance of NK cells for early control of *T. gondii* via IFN $\gamma$  is well established  
119 (Denkers et al., 1993, Sher et al., 1993, Combe et al., 2005, Goldszmid et al., 2012). We recently  
120 demonstrated that NK cells are also important in controlling secondary parasite infection in a  
121 vaccine-challenge model of *T. gondii* (Ivanova D. et al. in prep.). Our experimental approach to  
122 testing the importance of NK cells in this model involved the use of NK cell specific antibodies anti-  
123 NK1.1 and anti-ASGM1 to deplete the cells *in vivo*. C57BL6 mice were immunized with the  
124 attenuated type I strain *cps1-1* (CPS) and five weeks later challenged with a lethal dose of the CPS  
125 parental parasite strain RH and mouse survival and parasite burdens by real time semi quantitative  
126 PCR measured. We observed that anti-ASGM1 treatment resulted in the death of all of the animals  
127 within 11 days of type I RH challenge and 31 days after type II ME49 challenge (Fig. 1A). However,  
128 Anti-NK1.1 treatment did not result in death after type I RH and type II ME49 challenge (Fig. 1A).  
129 We also observed that parasite burdens were higher in immunized then challenged mice after anti-  
130 ASGM1 treatment (Fig. 1B-C, Supplementary Fig. 1A-C). In addition, the parasite burdens were  
131 greater in the mice treated with anti-ASGM1 compared to anti-NK1.1 (Supplementary Fig. 1B-C). In  
132 a separate set of experiments mice were chronically infected with ME49 cysts and then challenged  
133 with RH tach. in the presence or absence of anti-ASGM1. Anti-ASGM1-treated animals died much  
134 sooner compared to untreated controls (Fig. 1D). These results showed that, in comparison with anti-  
135 NK1.1 treatment, the administration of anti-ASGM1 during secondary *T. gondii* infection had a more  
136 robust effect on the parasite dissemination and the death of mice. Since both antibody treatment  
137 regimens effectively depleted NK cells (Supplementary Fig. 1D), this result suggested that anti-  
138 ASGM1 may have depleted additional cell subsets necessary for the protection during secondary *T.*  
139 *gondii* infection.

140

141 *Anti-ASGM1 treatment depletes CD8+ and CD4+ T cells after secondary challenge of T. gondii*  
142 *immunized mice*

143 *In vivo* antibody depletion of cells can have unexpected off target effects on other immune  
144 cells (Nishikado et al., 2011). Several studies showed that T cell numbers were reduced after anti-  
145 ASGM1 treatment during certain viral infections, including vaccinia virus, LCMV, reovirus and RSV  
146 (Stitz et al., 1986, Doherty and Allan, 1987, Parker et al., 1988, Moore et al., 2008). One study  
147 showed T cell numbers were reduced and the parasite burdens were increased after anti-ASGM1  
148 treatment, however, no death was observed and it was not clear whether the parasite burdens were  
149 increased due to the depletion of NK, T or both cell types (Moore et al., 2008). Based on these  
150 previous findings, increased susceptibility of *T. gondii* immunized and anti-ASGM1 treated during  
151 reinfection mice could be associated with the depletion of T cells. To address whether anti-ASGM1  
152 depleted not only NK cells, but also T cells in CPS-immunized animals, the CD8+ and CD4+ T cell  
153 frequencies and absolute numbers were measured by flow cytometry in the peritoneum (PEC) and  
154 spleens of antibody treated or not treated immunized mice. Anti-ASGM1 treatment did not  
155 significantly affect T cells in the peritoneum, but the numbers of CD4+ and CD8+ T cells were  
156 significantly reduced in the spleen (Fig. 2A-E), demonstrating that in the absence of secondary  
157 challenge anti-ASGM1 also depleted T cells. To address whether this treatment also depleted CD4+  
158 and CD8+ T cells during secondary challenge, anti-ASGM1 treated or non-treated CPS-immunized  
159 mice were challenged with RH and T cell numbers measured. Anti-ASGM1 administered upon RH  
160 challenge significantly reduced CD8+ T cell frequency and numbers in both peritoneum and the  
161 spleen compared to non-treated animals (Fig. 2A-E). In contrast, CD4+ T cells were not significantly  
162 affected by anti-ASGM1 treatment during challenge infection. In contrast to anti-ASGM1, anti-  
163 NK1.1 treatment did not reduce CD8+ and CD4+ T cell frequency and numbers in both peritoneum  
164 and spleen (Supplementary Fig. 2). This result suggests that the increased susceptibility of mice

165 during anti-ASGM1 treatment upon secondary *T. gondii* infection could be associated with the  
166 depletion of CD8+ and CD4+ T cells.

167

### 168 ***ASGM1 is differentially expressed on CD8+ and CD4+ T cells in T. gondii immunized mice***

169 The previous result showed that anti-ASGM1 treatment depleted CD8+ and CD4+ T cells  
170 with potentially CD8+ T cells being targeted more than CD4+ T cells. Previous studies indicate that  
171 CD8+ and CD4+ T cells have higher levels of ASGM1 on their surface after viral infections (Slifka  
172 et al., 2000, Moore et al., 2008) possibly making them susceptible to anti-ASGM1 depletion.  
173 Therefore, we measured by flow cytometry whether ASGM1 was expressed on CD8+ and CD4+ T  
174 cells after *T. gondii*-immunization in mice and how ASGM1 levels changed on T cells after challenge  
175 infection. ASGM1 was detected on both cell types in immunized mice (Fig. 3A-F). After secondary  
176 parasite infection, the frequency and number of ASGM1+ CD4+ T cells and number of ASGM1+  
177 CD8+ T cells increased at the challenge site (Fig. 3C-E). The frequency of ASGM1+ CD8+ T cells in  
178 peritoneum and spleen did not increase (Fig. 3 A-D). Interestingly, ASGM1 was expressed on a  
179 much higher percentage of CD8+ T cells than CD4+ T cells in both PEC and spleen.

180

### 181 ***Anti-ASGM1 treatment depletes effector and effector memory CD8+ T cell subsets***

182 Previous studies reported that ASGM1 was differentially enriched among different CD8+ T  
183 cell subsets. In naïve unimmunized mice central memory phenotype (CD44<sup>high</sup>, CD62L+, CCR7+ and  
184 CD122+) CD8+ T cells expressed more ASGM1 + than other T cell subsets (Kosaka et al., 2006,  
185 Kosaka et al., 2007). Since the mice in our studies were immunized and the protection was lost when  
186 the animals were treated with anti-ASGM1, this could suggest that ASGM1 might be enriched on *T.*  
187 *gondii* specific memory T cell populations. Therefore, we next determined whether ASGM1 was  
188 expressed on certain subsets of CD8+ T cells and whether these same subsets were preferentially  
189 depleted by anti-ASGM1 treatment. CPS-immunized mice were treated with anti-ASGM1 in the



190 absence or presence of RH infection and T cell phenotype was assayed based on the expression of  
191 CD44, a marker of antigen-experienced T cells (Budd et al., 1987) and CD62L, a marker of cells that  
192 home to lymph nodes (Lefrancois, 2006). In CPS-immunized mice CD8<sup>+</sup> T cells were distributed  
193 between Tcm (central memory, CD44<sup>+</sup>CD62L<sup>+</sup>) > Tn (naïve, CD44<sup>-</sup>CD62L<sup>+</sup>) > Tem (effector  
194 memory, CD44<sup>+</sup>CD62L<sup>-</sup>) > Tef (effector, CD44<sup>-</sup>CD62L<sup>-</sup>) (Fig. 4A) (Srivastava et al., 2018).  
195 ASGM1 was mainly expressed on antigen-experienced CD44<sup>high</sup> Tcm and Tem CD8<sup>+</sup> T cells in CPS  
196 immunized mice (Fig. 4B). After infection of CPS-immunized mice with RH, ASGM1 was also  
197 expressed on Tef and Tn CD8<sup>+</sup> T cells (Fig. 4B). Anti-ASGM1 reduced the frequency of all of the  
198 CD8<sup>+</sup> T cell subsets in CPS-immunized animals without RH challenge, except for the Tn subset,  
199 which increased after the depletion. After RH challenge, there was an expected increase in Tef.  
200 However, anti-ASGM1 treatment during this challenge infection significantly reduced effector T cell  
201 populations, including Tef and Tem, while the frequency of naïve T cells increased. Interestingly,  
202 among all T cell subsets, Tcm cells seemed resistant to anti-ASGM1 treatment. Our results indicate  
203 that ASGM1 is enriched on different CD8<sup>+</sup> T cell subsets after CPS immunization and secondary  
204 infection. We also observe that anti-ASGM1 treatment preferentially depletes effector populations of  
205 CD8<sup>+</sup> T cells including Tem and Tef.

206 CD11a and CD49d on CD8<sup>+</sup> T cells can be used as surrogate markers of *T. gondii*-specific  
207 CD8<sup>+</sup> T cells (Hwang et al., 2016). We therefore further explored whether *T. gondii*-specific  
208 CD11a<sup>+</sup>CD49d<sup>+</sup> CD8<sup>+</sup> T cells were depleted by anti-ASGM1 treatment and expressed ASGM1. The  
209 majority of CD8<sup>+</sup> T cells were CD11a<sup>+</sup>CD49d<sup>+</sup> and anti-ASGM1 treatment resulted in a depletion  
210 of these cells in CPS-immunized mice (Fig. 4C). Anti-ASGM1 also depleted these cells during  
211 secondary RH infection. Similarly to the previously observed increase in naïve CD8<sup>+</sup> T cells, non-*T.*  
212 *gondii* specific CD11a<sup>-</sup>CD49d<sup>-</sup> CD8<sup>+</sup> T cells increased after the depletion. In accordance to the  
213 depletion effect of anti-ASGM1, CD11a<sup>+</sup>CD49d<sup>+</sup> CD8<sup>+</sup> T cells were highly enriched in ASGM1  
214 expression in CPS-immunized mice and in the presence of RH challenge (Fig. 4D). The result

215 suggested that ASGM1 is enriched on *T. gondii*-specific CD8<sup>+</sup> T cells and these cells were depleted  
216 by anti-ASGM1 treatment.

217

### 218 ***Anti-ASGM1 treatment depletes activated CD8<sup>+</sup> and CD4<sup>+</sup> T cells***

219 The above data identified that ASGM1 was expressed on a majority of CD8<sup>+</sup> T cells that  
220 expressed surrogate markers of *T. gondii* specificity (CD11a and CD49d) and effector CD8<sup>+</sup> T cells  
221 were depleted the most by anti-ASGM1 treatment. One study showed that ASGM1<sup>+</sup> CD8<sup>+</sup> T cells  
222 produced more IFN $\gamma$  than ASGM1<sup>-</sup> CD8<sup>+</sup> T cells upon stimulation with IL-12 (+IL-2) *in vitro*  
223 (Kosaka et al., 2006). IL-12 is produced after *T. gondii* infection and is essential for protection *via*  
224 induction of IFN $\gamma$  (Gazzinelli et al., 1993, Hunter et al., 1995b, Yap et al., 2000). To find whether the  
225 increased susceptibility to the secondary infection during anti-ASGM1 treatment could be associated  
226 with the depletion of IFN $\gamma$ -producing T cells, CPS-immunized mice were challenged with RH and  
227 their CD8<sup>+</sup> and CD4<sup>+</sup> T cell functionality was assessed after treatment with anti-ASGM1 compared  
228 to non-treated controls. Peritoneal CD8<sup>+</sup> T cells were stimulated with TLA (Fig. 5A-B) or  
229 PMA/ionomycin (Fig. 5C-D) and stained intracellularly for IFN $\gamma$  and Granzyme B and single  
230 function as well as polyfunctional responses were measured by flow cytometry. Anti-ASGM1  
231 treatment significantly reduced the frequency and numbers of IFN $\gamma$ <sup>+</sup>, Granzyme B<sup>+</sup> and  
232 polyfunctional IFN $\gamma$ <sup>+</sup>GranzymeB<sup>+</sup> CD8<sup>+</sup> T cells in the peritoneum (Fig. 5A-D). In addition, there  
233 was a significant reduction in frequency and number of IFN $\gamma$ <sup>+</sup> CD4<sup>+</sup> T cells after anti-ASGM1  
234 treatment at the site of infection. Thus, anti-ASGM1 treatment depletes activated CD4<sup>+</sup> and CD8<sup>+</sup> T  
235 cells during secondary challenge of immunized mice.

236

### 237 ***IFN $\gamma$ supplementation prolongs the survival of reinfected and anti-ASGM1 treated mice***

238

239           Anti-ASGM1 treatment during reinfection increased the rate of mouse death and depleted  
240 IFN $\gamma$ + CD8+ and CD4+ T cells. To address whether the lethal effect of the antibody could be  
241 counterbalanced by IFN $\gamma$  supplementation, recombinant IFN $\gamma$  was administered during anti-ASGM1  
242 treatment of CPS-immunized and RH infected mice. The cytokine supplementation had a therapeutic  
243 effect and significantly prolonged the survival of anti-ASGM1 treated mice (Fig. 6). Therefore, the  
244 detrimental effect of anti-ASGM1 treatment on the health and survival of mice could be associated  
245 with the depletion of IFN $\gamma$ -producing CD8+ and CD4+ T cells in addition to IFN $\gamma$ -producing NK  
246 cells.  
247

## 248 **Discussion**

249 Two commonly used for NK cell depletion antibodies exhibited different effects on the  
250 survival of mice infected with *T. gondii*. In contrast to anti-NK1.1, *in vivo* anti-ASGM1 treatment  
251 during secondary *T. gondii* infection led to a higher increase in parasite burdens and was lethal. This  
252 suggested that anti-ASGM1 could have an off-target effect, such as depletion of a cell type other than  
253 NK cells necessary for protection. In line with that, we found that anti-ASGM1 treatment resulted in  
254 the depletion of T cells. This is important because the anti-ASGM1 antibody is widely used to  
255 deplete NK cells (Ferreira et al., 2018, Haspesslagh et al., 2018). Many studies on the role of NK cells  
256 in *T. gondii* infection also relied on the use of anti-ASGM1 (Hunter et al., 1994, Haque et al., 1999,  
257 Goldszmid et al., 2012). Our data showed that this treatment is not a specific approach to address the  
258 role of NK cells during *T. gondii* infection. Our findings emphasize that anti-ASGM1 should be used  
259 with caution and in combination with other NK cell-specific methods.

260 ASGM1+ T cells could be essential for protection against *T. gondii* infection. A few previous  
261 studies showed that anti-ASGM1 treatment did not deplete T cells in naïve mice (Nishikado et al.,  
262 2011), but negatively affected T cells in the mice challenged with viruses (reovirus, lymphocytic  
263 choriomeningitis virus (LCMV), vaccinia, respiratory syncytial virus (RSV)) and alloantigens (Stitz  
264 et al., 1986, Slifka et al., 2000, Moore et al., 2008). While the treatment was shown to deplete viral-  
265 activated T cells (Stitz et al., 1986, Slifka et al., 2000), none of those studies reported the death of  
266 mice after the treatment. A single study showed T cell depletion by anti-ASGM1 and also addressed  
267 the effect of the treatment on the health outcome (Moore et al., 2008). There, anti-ASGM1 treatment  
268 was associated with a higher parasite burden after infection with RSV; however, all mice survived  
269 and had lower weight loss than control mice, suggesting that ASGM1+ cells also contributed to RSV-  
270 induced illness (Moore et al., 2008). Whether this health outcome was caused by depletion of  
271 ASGM1+ T cells or NK cells was not specified. The lethality of anti-ASGM1 treatment during

272 secondary *T. gondii* infection suggested that ASGM1<sup>+</sup> T cells could be more essential for protection  
273 against infection with *T. gondii* parasites than viruses.

274 ASGM1 could be a marker of specific T cell subsets. In naïve unimmunized mice ASGM1  
275 was expressed on Tcm (defined as CD44<sup>high</sup>, CD62L<sup>+</sup>, CCR7<sup>+</sup>) CD8<sup>+</sup> T cells (Kosaka et al., 2007).  
276 We found that in *T. gondii*-immunized mice ASGM1 was expressed on memory phenotype CD8<sup>+</sup> T  
277 cells, including both Tem (CD44<sup>high</sup> CD62L<sup>-</sup>) and Tcm (CD44<sup>high</sup> CD62L<sup>+</sup>) (Srivastava et al., 2018).  
278 After reinfection, ASGM1 was distributed between all CD8<sup>+</sup> T cell subsets, including Tef and Tn.  
279 Importantly, effector phenotype CD8<sup>+</sup> T cells (Tef and Tem) were more susceptible to anti-ASGM1  
280 treatment than Tn and Tcm. A previous study also suggested that effector or memory T cells could be  
281 more susceptible to the treatment than naïve T cells (Stitz et al., 1986). Virus-specific T cell activity  
282 was reduced when anti-ASGM1 was administered after and not before infections with vaccinia or  
283 LCMV (Stitz et al., 1986). Furthermore, we found that anti-ASGM1 treatment selectively eliminated  
284 CD8<sup>+</sup> T cells that provided effector functions (IFN $\gamma$  and GranzymeB) in response to reinfection.  
285 Similar to our findings, the majority of ASGM1<sup>+</sup> CD8<sup>+</sup> T cells produced IFN $\gamma$  and were virus-  
286 specific after viral infections (Slifka et al., 2000, Moore et al., 2008). It is possible that ASGM1  
287 could be expressed on *T. gondii*-specific CD8<sup>+</sup> T cells. In support of this, we found that ASGM1 was  
288 enriched on CD8<sup>+</sup> T cells that expressed surrogate markers of *T. gondii*-specificity (CD11a and  
289 CD49d) (Hwang et al., 2016). Whether or not ASGM1 is a marker *T. gondii*-specific CD8<sup>+</sup> T cells  
290 would be important to confirm using MHC tetramer staining (Marple et al., 2017). Alternatively,  
291 ASGM1 could be expressed on cytokine-activated T cells. ASGM1<sup>+</sup> CD8<sup>+</sup> T cells from naïve mice  
292 were shown to produce more IFN $\gamma$  than ASGM1<sup>-</sup> CD8<sup>+</sup> T cells after IL-12 (+IL-2) stimulation  
293 (Kosaka et al., 2007). After *T. gondii* infection IL-12 is abundantly produced (Gazzinelli et al., 1993,  
294 Khan et al., 1994, Hunter et al., 1994, Hunter et al., 1995b). Therefore, IL-12 could induce activation  
295 of ASGM1<sup>+</sup> CD8<sup>+</sup> T cells after *T. gondii* infection. Elucidation of the stimuli necessary for induction

296 of ASGM1 expression on T cells could provide the cues on its functional importance and reveal its  
297 potential in use for immunotherapies.

298 CD4<sup>+</sup> T cells were negatively affected by anti-ASGM1 treatment of *T. gondii*-immunized  
299 mice. In addition to CD8<sup>+</sup> T cells, total splenic and IFN $\gamma$ -producing peritoneal CD4<sup>+</sup> T cells were  
300 reduced after the treatment. This is in accordance to an early study on NK cell role in protection  
301 against *T. gondii* reinfection in the absence of CD8<sup>+</sup> T cells (Denkers et al., 1993). *T. gondii*-  
302 immunized CD8<sup>+</sup> T cell deficient mice ( $\beta 2m^{-/-}$ ) survived lethal reinfection and died after anti-NK1.1  
303 or anti-ASGM1 treatments. Interestingly, mice died faster after anti-ASGM1 treatment as compared  
304 to anti-NK1.1. This result implied that these treatments could have different effects on the cells other  
305 than CD8<sup>+</sup> T cells and NK cells, potentially CD4<sup>+</sup> T cells (Denkers et al., 1993).

306 The functional role of ASGM1-mediated signaling in T cells is not known. One possibility is  
307 that ASGM1 could be functionally relevant for T cell biology as a part of lipid rafts. ASGM1 is a  
308 glycolipid that is enriched in lipid rafts, small dynamic ordered domains that compartmentalize  
309 cellular processes (Pike, 2006). Upon T cell activation, TCR engagement leads to an aggregation of  
310 these domains (Dinic et al., 2015). This aggregation then facilitates TCR signaling by bringing  
311 molecules needed for TCR closer to each other. It was found earlier that engagement of GM1 by  
312 cholera toxin leads to an activation of T cells (Janes et al., 1999). ASGM1 is a derivative of GM1 and  
313 colocalizes with GM1 in the lipid rafts on T cells (Moore et al., 2008). ASGM1 could also be  
314 involved in TCR signaling and T cell activation. Whether the presence and quantity of ASGM1 in  
315 lipid rafts affects T cell functionality is not known. In addition, whether T cells with enriched  
316 ASGM1 lipid raft content have a superior ability for TCR signaling and activation as compared to  
317 ASGM1 negative T cells remains to be investigated. That would be important to address as it could  
318 be useful for the future design of T cell-based immunotherapies.

319 As a further point, the presence of ASGM1 could be advantageous for T cell survival during  
320 *T. gondii* infection. This is because ASGM1 is an asialylated derivative of GM1 (Moore et al., 2008).

321 Due to an abundance of sialic acids on the cell surfaces, many viruses and bacteria use host-sialylated  
322 structures for binding and recognition (Schwegmann-Wessels et al., 2011, Neu et al., 2011).  
323 Apicomplexan parasites, including *T. gondii* and *Plasmodium falciparum*, also employ recognition of  
324 sialic acids as part of interactions with the hosts (Monteiro et al., 1998, Blumenschein et al., 2007,  
325 Gaur and Chitnis, 2011). The *T. gondii* microneme proteins bind to sialylated glycoconjugates on  
326 host cells and facilitate invasion (Blumenschein et al., 2007, Friedrich et al., 2010). As any other  
327 nucleated cells, T cells can get *T. gondii*-infected and killed by parasites or lymphocytes. Therefore,  
328 one possible mechanism by which ASGM1+ CD8+ T cells could have an advantage in survival over  
329 ASGM1- CD8+ cells during *T. gondii* infection could be their reduced sialic acid content and thus  
330 resistance to being infected by the parasites.

331 In summary, our data showed that anti-ASGM1 antibody treatment is not a specific approach  
332 to study the role of NK cells during *T. gondii* infection. This method could be informative when used  
333 with caution and in combination with other NK cell specific methods. We demonstrated that in *T.*  
334 *gondii*-immunized mice certain subsets of CD8+ and CD4+ T cells express ASGM1 and get depleted  
335 by anti-ASGM1. Elimination of T cells correlated with increased susceptibility to secondary *T.*  
336 *gondii* infection.

337

## 338 **Materials and Methods**

339

340 **Mice.** C57BL/6 (B6) mice were purchased from The Jackson Laboratory. Animals were housed in  
341 specific pathogen-free conditions at the University of Wyoming Animal Facility.

342 **Ethics Statement.** This study was carried out in strict accordance following the recommendations in  
343 the Guide for the Care and Use of Laboratory Animals of the National Institutes of Health. The  
344 protocol was approved by the Institutional Animal Care and Use Committee (IACUC) of the  
345 University of Wyoming (PHS/NIH/OLAW assurance number: A3216-01).

346 ***T. gondii* parasites, infections.** Tachyzoites (tach.) of RH and RH $\Delta$ *cpsII* (*cpsI-1*, CPS) strains  
347 (kindly provided by Dr. Bzik, Dartmouth College, NH) were cultured by serial passage in human  
348 fetal lung fibroblast (MRC5) cell monolayers in complete DMEM (supplemented with 0.2 mM uracil  
349 for *cpsI-1* strain). The parasites were purified by filtration through a 3.0- $\mu$ m filter (Merck Millipore  
350 Ltd.), then washed with phosphate-buffered saline (1 X PBS) and administered intraperitoneally (i.p.)  
351  $1 \times 10^3$  RH tach. or  $1 \times 10^6$  *cpsI-1* tach. The brains of 5 wk ME49 infected CBA mice were harvested  
352 and 100 ME49 cysts were administered intragastrically (i.g.).

353 **Real-time PCR for parasite burden.** DNA was extracted from entire PECs and spleens harvested  
354 from infected mice using a Qiagen DNeasy Blood & Tissue Kit (Qiagen Sciences). Parasite DNA  
355 from 600 ng of PECs, 800 ng of splenic or brain tissue DNA was amplified using primers specific for  
356 the *T. gondii* B1 gene (forward primer GGAAGTGCATCCGTTTCATG and reverse primer  
357 TCTTTAAAGCGTTCGTGGTC) at 10 pmol of each per reaction (Integrated DNA Technologies) by  
358 real-time fluorogenic PCR using SsoAdvanced<sup>TM</sup> Universal IT SYBR<sup>®</sup> Green SMx (BIO-RAD) on a  
359 CFX Connect<sup>TM</sup> Real-Time System cycler (BIO-RAD). Parasite equivalents were determined by  
360 extrapolation from a standard curve.

361



362 ***In vivo treatments.*** Anti-NK1.1 (clone PK136, Bio X cell) was diluted in 1X PBS and administered  
363 i.p. at 200 µg one day before (d -1), the day of infection (d 0) and every other day after for the  
364 maximum duration of 21 d. Anti-Asialo GM1 (Rabbit, FUJIFILM Wako) was diluted in 1 mL sterile  
365 H<sub>2</sub>O and administered i.p. at 50 µl on d -1, 0 and every third day after.

366 ***Flow cytometry.*** Peritoneal exudate cells (PEC) and splenocytes were harvested as previously  
367 described (Ivanova et al., 2016) and plated at 0.5-1.5x10<sup>6</sup> cells/well. For surface staining, cells were  
368 washed twice with 1X PBS and stained for viability in 1 X PBS using Fixable Live/Dead Aqua dye  
369 (Invitrogen) for 30 min. After washing with 1 X PBS, surface staining was performed using  
370 antibodies diluted in stain wash buffer (SWB, 2% FBS in 1 X PBS and EDTA) for 25 min on ice. For  
371 functional assays, cells were stimulated with 20 µg/mL Toxoplasma Lysate Antigen (TLA) for 8 h in  
372 complete Isclove's media and then treated with 0.7 X PTIC for 4 h. For additional functional assays,  
373 cells were incubated for 8 h in complete Isclove's media and then treated with 0.7 X Cell Stimulation  
374 Cocktail containing PMA/ionomycin and PTIC (eBioscience, ThermoFisher) for 4 h. After live dead  
375 and surface staining, cells were fixed and permeabilized for 1 h on ice (BD bioscience, Fix/Perm  
376 solution) followed by intracellular staining in 1 X permeabilization wash buffer (BD) with anti-IFN $\gamma$ ,  
377 anti-TNF $\alpha$ , anti-Granzyme B antibody for 40 min. After washing twice with 1X PBS, cells were  
378 resuspended in 1X PBS and acquired using Guava easyCyte HT (Millipore). All samples were  
379 analyzed with FlowJo software (Tree Star). The antibodies purchased from Biolegend were: CD3  
380 (17A2), CD4 (RM4-5), CD8b (YTS156.7.7), NK1.1 (PK136), Asialo-GM1 (Poly21460), CD44  
381 (IM7), CD62L (MEL-14), CD11a (M17/4), CD49d (R1-2). The antibodies purchased from  
382 eBioscience/ThermoFisher were: IFN $\gamma$  (XMG1.2), TNF $\alpha$  (Mab11), Granzyme B (NGZB).

383 ***Statistical analysis.*** Statistical analysis was performed using Prism 7.0d (GraphPad) or Microsoft  
384 Excel 2011. Significant differences were calculated using either unpaired Student's t-test or analysis  
385 of variance (ANOVA). The log-rank (Mantel-Cox) test was used to evaluate survival rate.

386 Significance is denoted where \*p<0.05, \*\*p<0.01, \*\*\*p<0.001, \*\*\*\*p<0.0001.

387 **Acknowledgments**

388 We thank Rida Fatima, Tiffany Mundhenke, Sally Murray and Ryan Krempels for assistance.

389 **Figure legends**

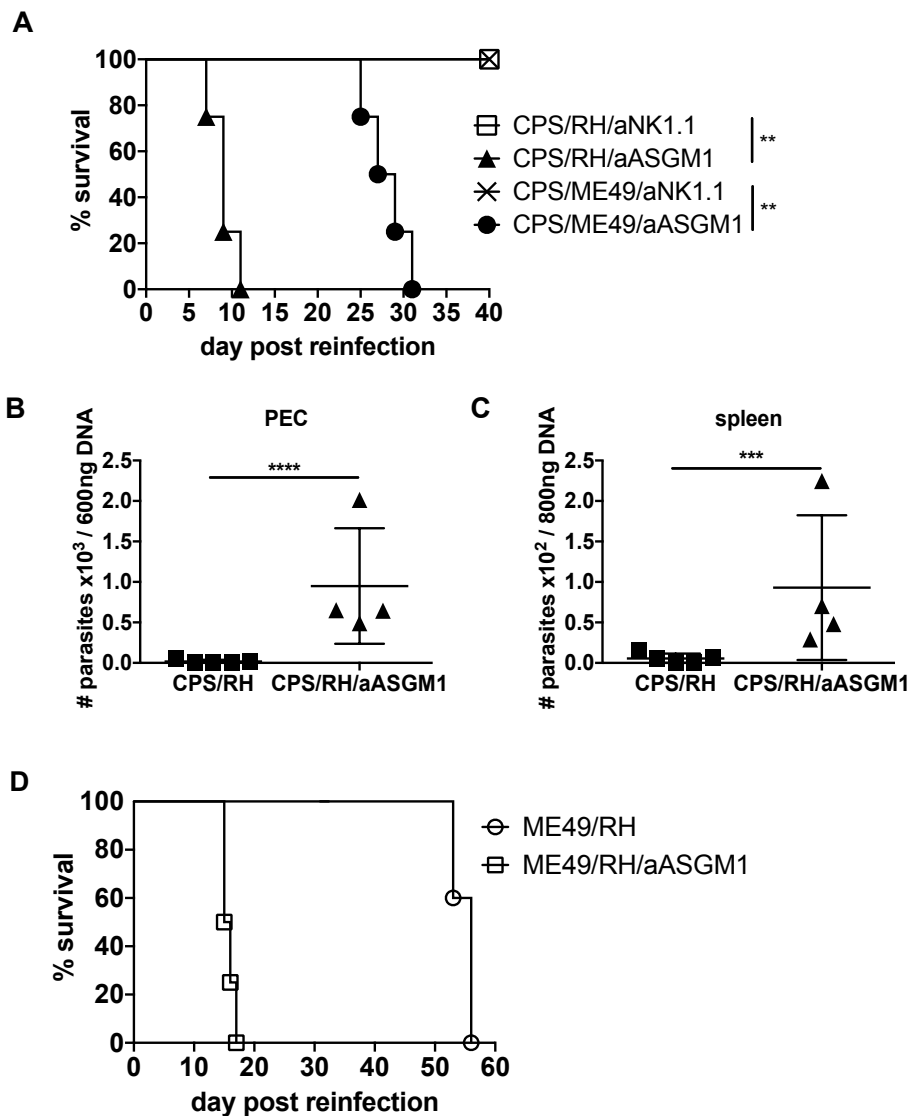

390

391 **Figure 1. Anti-ASGM1 treatment during secondary *T. gondii* infection leads to rapid death and**

392 **increased parasite burdens.** (A-C) Immunized i.p. with 1 X 10<sup>6</sup> CPS tach. C57BL/6 mice were five

393 to six weeks later infected i.p. with 1 X10<sup>3</sup> RH tach. (A-C) or i.g. with 100 ME49 brain cysts (A) and

394 treated with anti-NK1.1 (PK136) (A) or anti-ASGM1 (A-C) during secondary infections. (A) The

395 survival curve represents one of three to four experiments, n=4 to 5. (B and C) The parasite burdens

396 measured by real time PCR for *T. gondii* B1 gene 8 days after RH infection in PEC (B) and spleen

397 (C). The data represent one of two experiments, n=4 to 5. (D) Infected with 10 ME49 cysts i.p.

398 C57BL/6 mice were four weeks later infected with 1 X10<sup>3</sup> RH tach. i.p. and treated with anti-

399 ASGM1 upon reinfection. The survival curve represents one of two experiments, n=3 to 5. The log-  
400 rank (Mantel-Cox) test was used to evaluate survival rates. Ordinary one-way ANOVA was used to  
401 evaluate the parasite burdens. Data are mean  $\pm$  SD. \*p<0.05, \*\*p<0.01, \*\*\*p<0.001, \*\*\*\*p<0.0001.

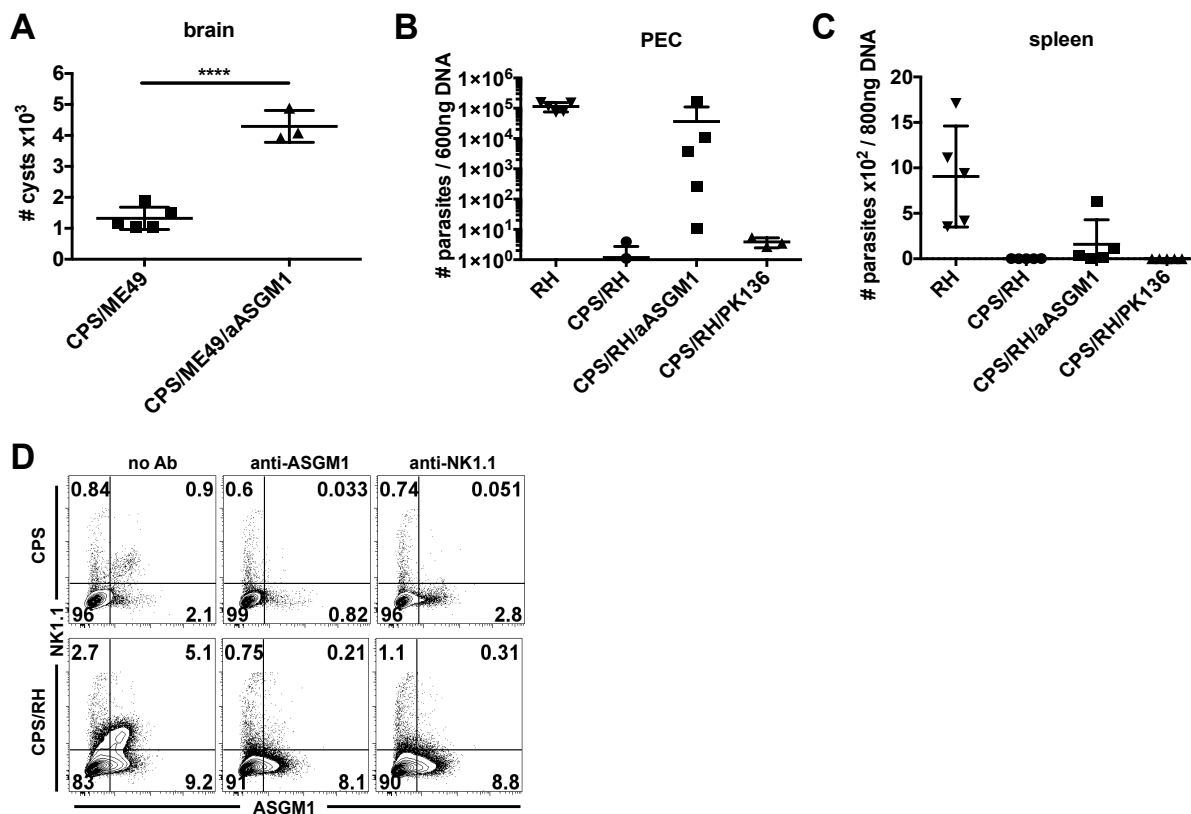

402

403 **Figure 2. Anti-ASGM1 and anti-NK1.1 treatments during secondary *T. gondii* infection. (A-D)**

404 Immunized i.p. with  $1 \times 10^6$  CPS tach. C57BL/6 mice were five to six weeks later infected i.g. with

405 20 ME49 brain cysts (A) or i.p. with  $1 \times 10^3$  RH tach. (B-D) and treated with anti-ASGM1 (A-D) or

406 anti-NK1.1 (PK136) (B-D) during secondary infection. (A) The brain cysts were counted after ME49

407 reinfection at 35 dpi in control mice and immediately after the death in anti-ASGM1 treated mice.

408 The data represent 1 experiment, n=3 to 5. (B-C) The parasite burdens were measured by real time

409 PCR for *T. gondii* B1 gene 8 days after RH reinfection in PEC (B) and spleen (C). The data represent

410 one experiment, n=3 to 5. (D) NK cell (gated as NK1.1+ASGM1+ live lymphocytes) depletion after

411 anti-ASGM1 or anti-NK1.1 treatment was measured by flow cytometry. Representative contour plots

412 from one of two experiments, n=3 to 4. Ordinary one-way ANOVA, data are mean  $\pm$  SD,

413 \*\*\*\*p<0.0001.

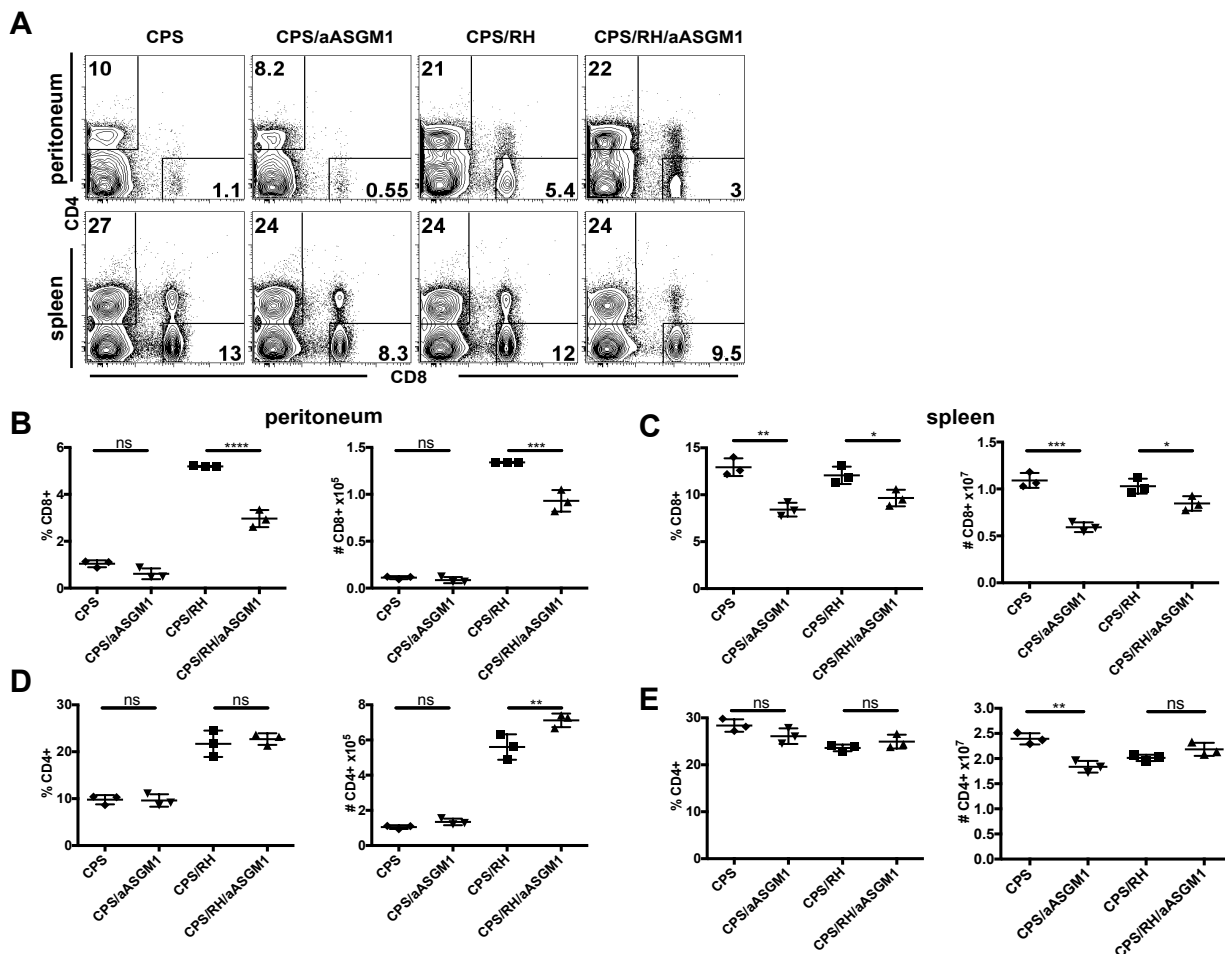

414

415 **Figure 3. Anti-ASGM1 treatment depletes CD8+ and CD4+ T cells in *T. gondii*-immunized**  
 416 **mice.** (A-E) C57BL/6 mice were immunized i.p. with  $1 \times 10^6$  CPS tach. and infected i.p. with  $1$   
 417  $\times 10^3$  RH tach. and treated with anti-ASGM1 antibody. PECs and spleens were analyzed by flow  
 418 cytometry at day 3 post RH infection. (A) Representative contour plots of CD8+ and CD4+ T cells  
 419 (gated on NK1.1- live lymphocytes). The percentages and numbers of CD8+ T cells per PEC (B) or  
 420 spleen (C). The percentages and numbers of CD4+ T cells per PEC (D) or spleen (E). Data are  
 421 representative of one of three experiments, n=3 to 4. Data are mean  $\pm$  SD. \*p<0.05, \*\*p<0.01,  
 422 \*\*\*p<0.001, \*\*\*\*p<0.0001, ordinary one-way ANOVA.

423

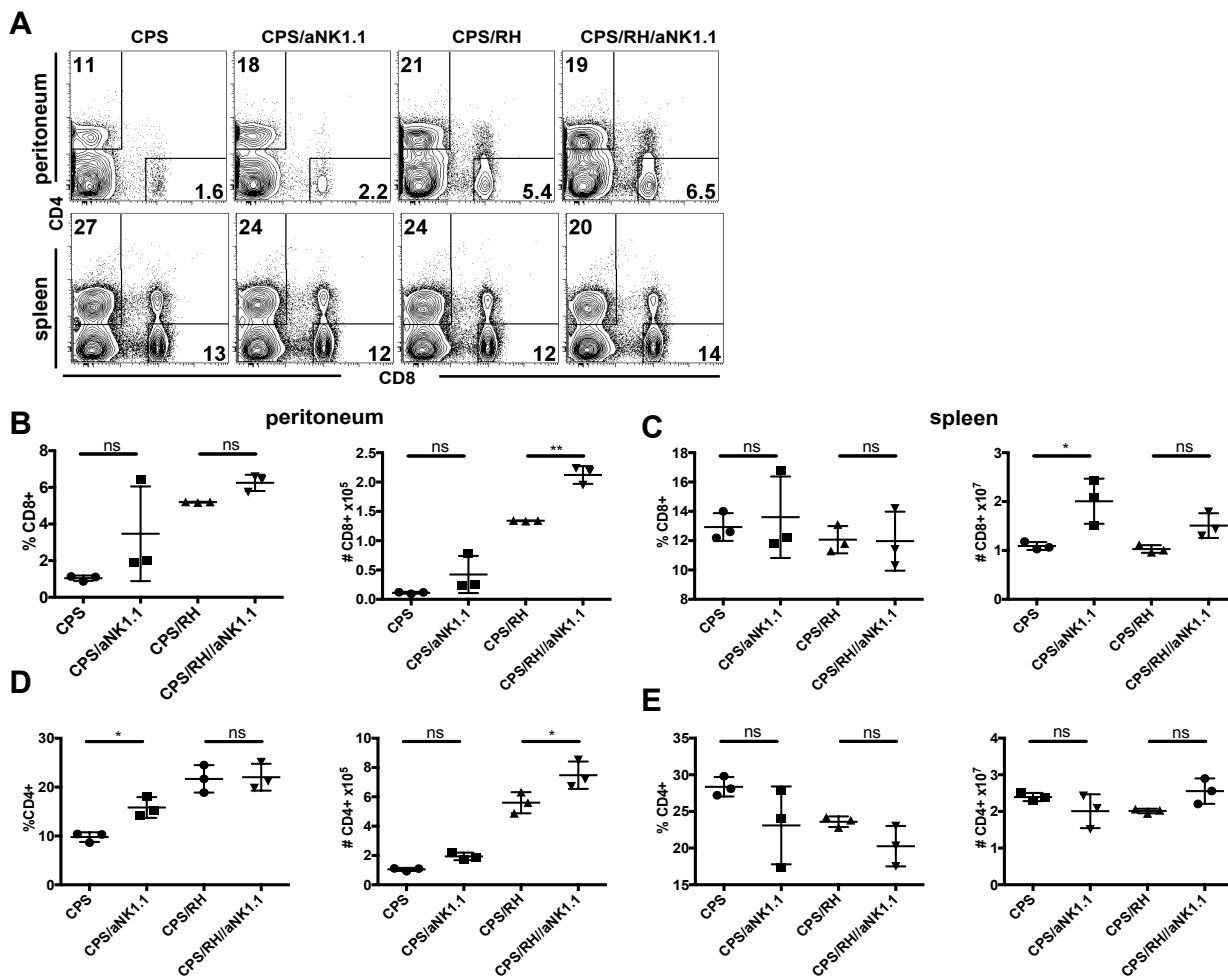

424

425 **Figure 4. Anti-NK1.1 treatment does not deplete CD8+ and CD4+ T cells in *T. gondii*-**

426 **immunized mice.** C57BL/6 mice were immunized i.p. with  $1 \times 10^6$  CPS tach. and infected i.p. with

427  $1 \times 10^3$  RH tach. six weeks later and treated with anti-NK1.1 antibody. PECs and spleens were

428 analyzed by flow cytometry at day 3 post RH infection. (A) Representative contour plots of CD8+ T

429 and CD4+ T cells (gated on NK1.1- live lymphocytes). The percentages and numbers of CD8+ T

430 cells per PEC (B) or spleen (C). The percentages and numbers of CD4+ T cells per PEC (D) or

431 spleen (E). Data are representative of one of three experiments, n=3 to 4. Data are mean  $\pm$  SD.

432 \*p<0.05, \*\*p<0.01, \*\*\*p<0.001, \*\*\*\*p<0.0001, ordinary one-way ANOVA.

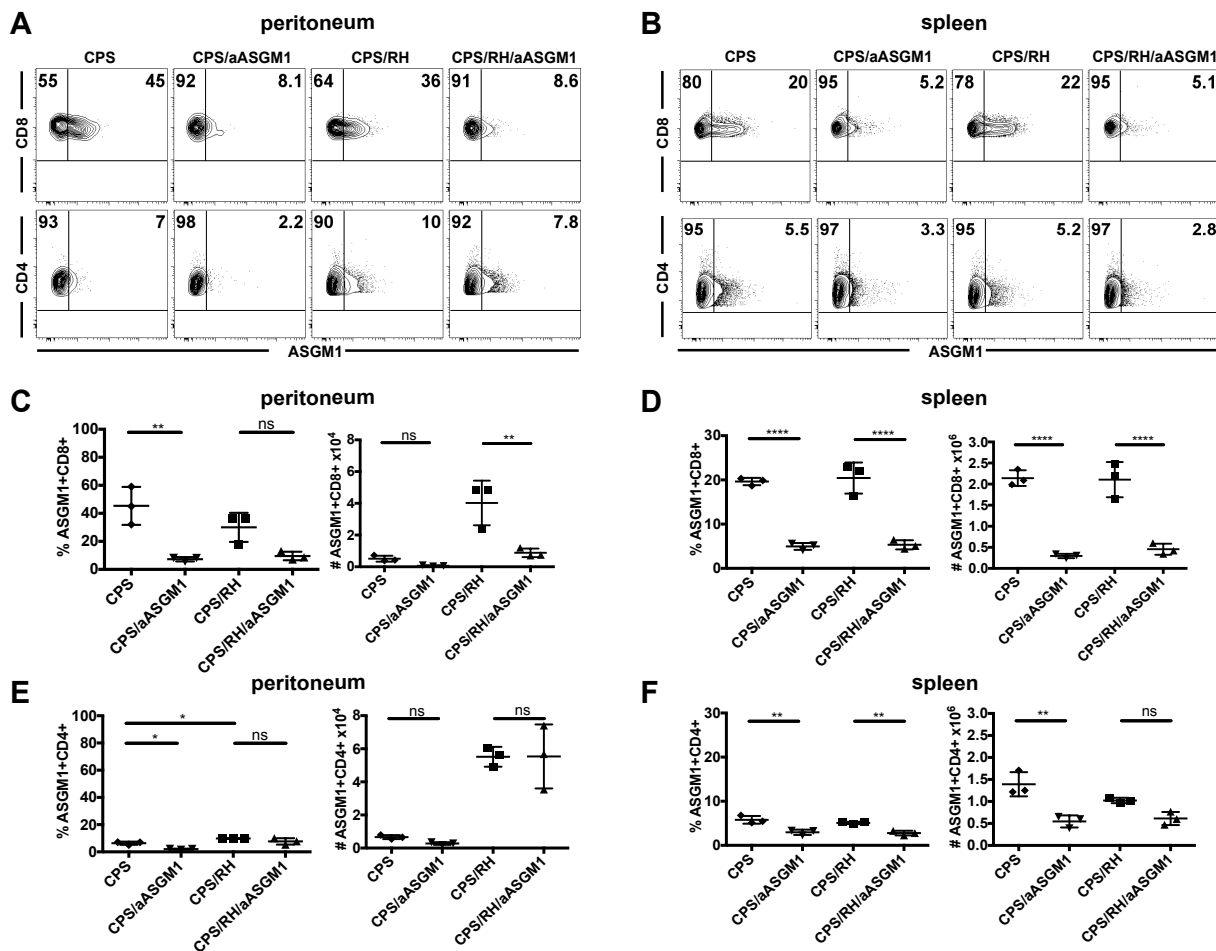

433

434 **Figure 5. CD8+ and CD4+ T cells differentially express ASGM1 in *T. gondii* immunized mice.**

435 (A-D) C57BL/6 mice were immunized i.p. with 1 X 10<sup>6</sup> CPS tach. and infected i.p. with 1 X10<sup>3</sup> RH

436 tach. six weeks later. PECs and spleens were analyzed by flow cytometry at day 3 post RH infection.

437 (A) Representative contour plots of ASGM1 expression on CD8+ and CD4+ T cells (gated on

438 NK1.1- live lymphocytes) in peritoneum (A) or spleen (B). The percentages and numbers of CD8+ T

439 cells per peritoneum (C) or spleen (D). The percentages and numbers of CD4+ T cells per

440 peritoneum (E) or spleen (F). Data are representative of one of three experiments, n=3 to 4. Data are

441 mean ± SD. \*p<0.05, \*\*p<0.01, \*\*\*p<0.001, \*\*\*\*p<0.0001, ordinary one-way ANOVA.



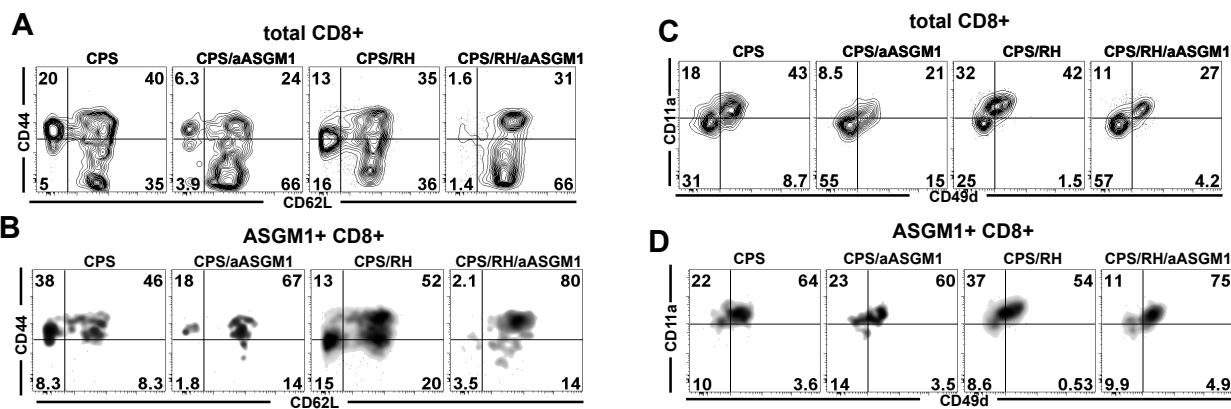

442

443 **Figure 6. Anti-ASGM1 treatment depletes effector and effector memory CD8+ T cell subsets.**

444 (A-D) C57BL/6 mice were immunized i.p. with  $1 \times 10^6$  CPS tach. and infected i.p. with  $1 \times 10^3$  RH

445 tach. six weeks later. PECs were analyzed by flow cytometry at day 3 post RH infection.

446 Representative contour plots of CD44 and CD62L expression on total CD8+ T cells (gated on

447 NK1.1- live lymphocytes) (A) and on ASGM1+ CD8+ T cells (B). Representative contour plots of

448 CD11a and CD49d expression on total CD8+ T cells (gated on NK1.1- live lymphocytes) (C) and on

449 ASGM1+ CD8b+ T cells (D). Data are representative of one of two experiments, n=3 to 4. Data are

450 mean  $\pm$  SD. \*p<0.05, \*\*p<0.01, \*\*\*p<0.001, \*\*\*\*p<0.0001, ordinary one-way ANOVA.

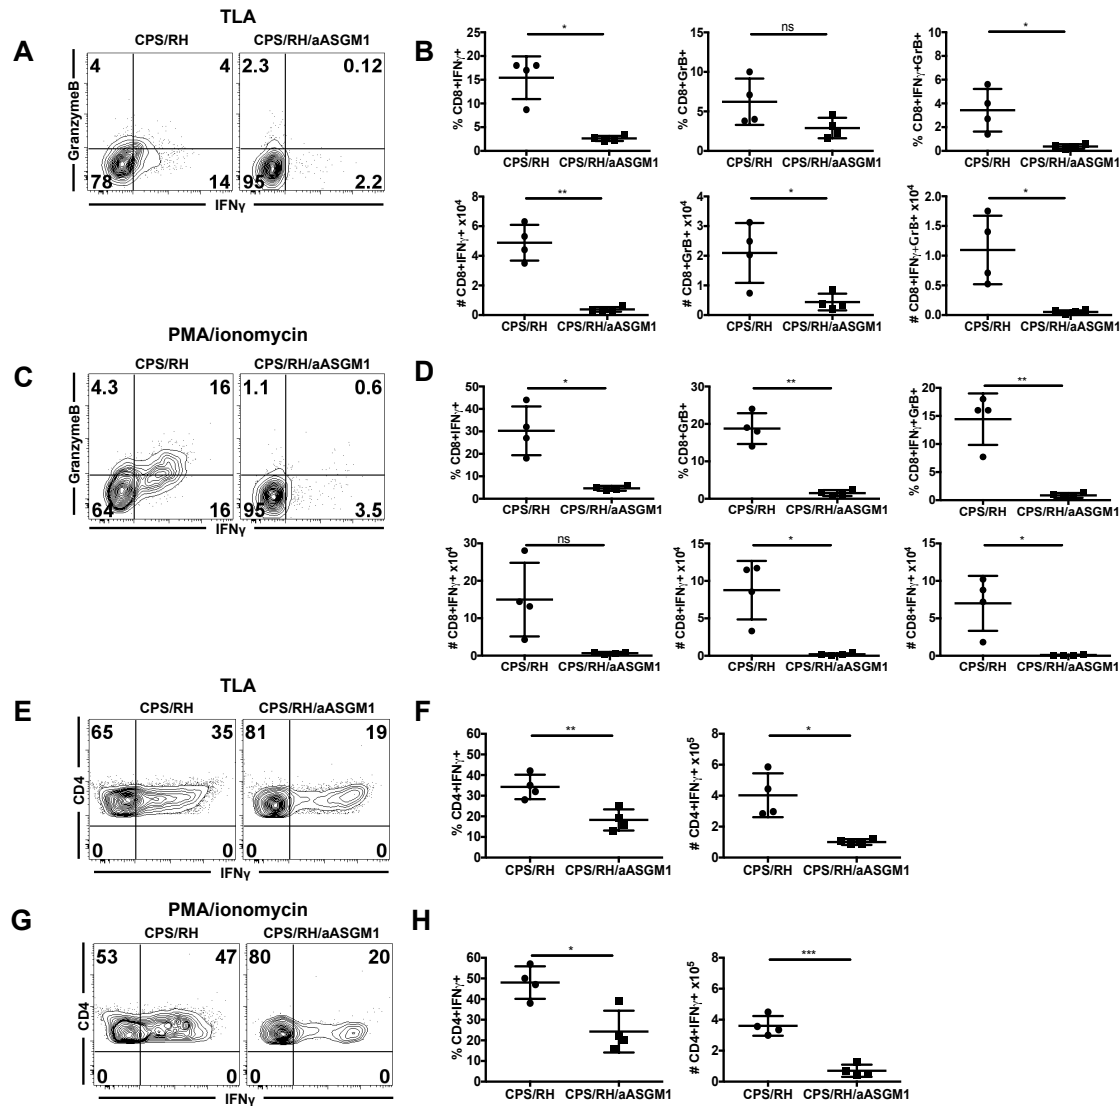

451

452 **Figure 7. Anti-ASGM1 treatment depletes activated CD8+ and CD4+ T cells. (A-H)** C57BL/6  
 453 mice were immunized i.p. with  $1 \times 10^6$  CPS tach. and infected i.p. with  $1 \times 10^3$  RH tach. six weeks  
 454 later. PECs were analyzed by flow cytometry at day 3 post RH infection. Representative contour  
 455 plots of intracellular staining for IFN $\gamma$  and Granzyme B on CD8+ T cells (gated on CD8b+ live  
 456 lymphocytes) after TLA stimulation (A) and in the presence of PMA/ionomycin stimulation (C). The  
 457 percentages and numbers of IFN $\gamma$ +, GranzymeB+ and IFN $\gamma$ +GranzymeB+ CD8+ T after TLA (B) or  
 458 PMA/ionomycin stimulation (D). Representative contour plots of intracellular staining for IFN $\gamma$  on  
 459 CD4+ T cells (gated on live lymphocytes) after TLA stimulation (E) and in the presence of  
 460 PMA/ionomycin (G). The percentages and numbers of IFN $\gamma$ + CD4+ T after TLA (F) or

461 PMA/ionomycin stimulation (**H**). Data are representative of 1 of 2 experiments, n=4 to 3. Data are  
462 mean  $\pm$  SD. \*p<0.05, \*\*p<0.01, \*\*\*p<0.001, \*\*\*\*p<0.0001, ordinary one-way ANOVA.

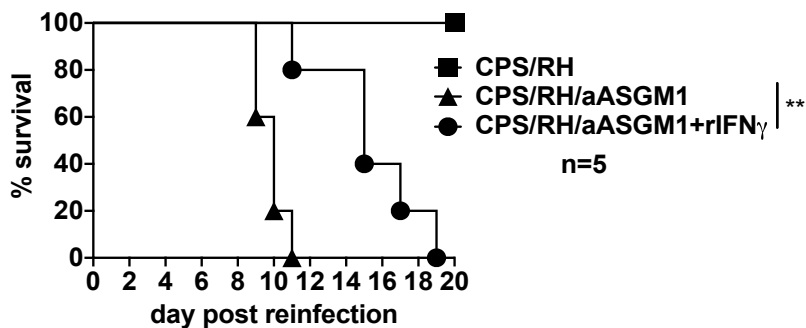

463

464 **Figure 8. IFN $\gamma$  supplementation prolongs the survival of *T. gondii* reinfected and anti-ASGM1**  
465 **treated mice.** Immunized i.p. with  $1 \times 10^6$  CPS tach. C57BL/6 mice were five to six weeks later  
466 infected i.p. with  $1 \times 10^3$  RH tach. and treated with anti-ASGM1 during secondary infection in the  
467 presence of recombinant IFN $\gamma$  supplementation. The survival curve represents 1 experiments, n=5.  
468 The log-rank (Mantel-Cox) test was used to evaluate survival rates, \*\*p<0.01.

469

470 **References**

- 471 ASKENASE, M. H., HAN, S. J., BYRD, A. L., MORAIS DA FONSECA, D., BOULADOUX, N.,  
472 WILHELM, C., KONKEL, J. E., HAND, T. W., LACERDA-QUEIROZ, N., SU, X. Z.,  
473 TRINCHIERI, G., GRAINGER, J. R. & BELKAID, Y. 2015. Bone-Marrow-Resident NK  
474 Cells Prime Monocytes for Regulatory Function during Infection. *Immunity*, 42, 1130-42.
- 475 CARLYLE, J. R., MESCI, A., LJUTIC, B., BELANGER, S., TAI, L. H., ROUSSELLE, E., TROKE,  
476 A. D., PROTEAU, M. F. & MAKRIGIANNIS, A. P. 2006. Molecular and genetic basis for  
477 strain-dependent NK1.1 alloreactivity of mouse NK cells. *J Immunol*, 176, 7511-24.
- 478 DENKERS, E. Y., GAZZINELLI, R. T., MARTIN, D. & SHER, A. 1993. Emergence of NK1.1+  
479 cells as effectors of IFN-gamma dependent immunity to *Toxoplasma gondii* in MHC class I-  
480 deficient mice. *J Exp Med*, 178, 1465-72.
- 481 DINIC, J., RIEHL, A., ADLER, J. & PARMRYD, I. 2015. The T cell receptor resides in ordered  
482 plasma membrane nanodomains that aggregate upon patching of the receptor. *Sci Rep*, 5,  
483 10082.
- 484 ECKELHART, E., WARSCH, W., ZEBEDIN, E., SIMMA, O., STOIBER, D., KOLBE, T.,  
485 RULICKE, T., MUELLER, M., CASANOVA, E. & SEXL, V. 2011. A novel Ncr1-Cre  
486 mouse reveals the essential role of STAT5 for NK-cell survival and development. *Blood*, 117,  
487 1565-73.
- 488 GOLDSZMID, R. S., CASPAR, P., RIVOLLIER, A., WHITE, S., DZUTSEV, A., HIENY, S.,  
489 KELSALL, B., TRINCHIERI, G. & SHER, A. 2012. NK cell-derived interferon-gamma  
490 orchestrates cellular dynamics and the differentiation of monocytes into dendritic cells at the  
491 site of infection. *Immunity*, 36, 1047-59.
- 492 HAQUE, S., FRANCK, J., DUMON, H., KASPER, L. H. & HAQUE, A. 1999. Protection against  
493 lethal toxoplasmosis in mice by an avirulent strain of *Toxoplasma gondii*: stimulation of IFN-  
494 gamma and TNF-alpha response. *Exp Parasitol*, 93, 231-40.

- 495 HUNTER, C. A., SUBAUSTE, C. S., VAN CLEAVE, V. H. & REMINGTON, J. S. 1994.  
496 Production of gamma interferon by natural killer cells from *Toxoplasma gondii*-infected  
497 SCID mice: regulation by interleukin-10, interleukin-12, and tumor necrosis factor alpha.  
498 *Infect Immun*, 62, 2818-24.
- 499 JANES, P. W., LEY, S. C. & MAGEE, A. I. 1999. Aggregation of lipid rafts accompanies signaling  
500 via the T cell antigen receptor. *J Cell Biol*, 147, 447-61.
- 501 JESSEN, B., MAUL-PAVICIC, A., UFHEIL, H., VRAETZ, T., ENDERS, A., LEHMBERG, K.,  
502 LANGLER, A., GROSS-WIELTSCH, U., BAY, A., KAYA, Z., BRYCESON, Y. T.,  
503 KOSCIELNIAK, E., BADAWEY, S., DAVIES, G., HUFNAGEL, M., SCHMITT-GRAEFF,  
504 A., AICHELE, P., ZUR STADT, U., SCHWARZ, K. & EHL, S. 2011. Subtle differences in  
505 CTL cytotoxicity determine susceptibility to hemophagocytic lymphohistiocytosis in mice  
506 and humans with Chediak-Higashi syndrome. *Blood*, 118, 4620-9.
- 507 KASAI, M., IWAMORI, M., NAGAI, Y., OKUMURA, K. & TADA, T. 1980. A glycolipid on the  
508 surface of mouse natural killer cells. *Eur J Immunol*, 10, 175-80.
- 509 KOSAKA, A., WAKITA, D., MATSUBARA, N., TOGASHI, Y., NISHIMURA, S., KITAMURA,  
510 H. & NISHIMURA, T. 2007. AsialoGM1+CD8+ central memory-type T cells in  
511 unimmunized mice as novel immunomodulator of IFN-gamma-dependent type 1 immunity.  
512 *Int Immunol*, 19, 249-56.
- 513 MOORE, M. L., CHI, M. H., GOLENIEWSKA, K., DURBIN, J. E. & PEEBLES, R. S., JR. 2008.  
514 Differential regulation of GM1 and asialo-GM1 expression by T cells and natural killer (NK)  
515 cells in respiratory syncytial virus infection. *Viral Immunol*, 21, 327-39.
- 516 NISHIKADO, H., MUKAI, K., KAWANO, Y., MINEGISHI, Y. & KARASUYAMA, H. 2011. NK  
517 cell-depleting anti-asialo GM1 antibody exhibits a lethal off-target effect on basophils in vivo.  
518 *J Immunol*, 186, 5766-71.

- 519 PARKER, S. E., SUN, Y. H. & SEARS, D. W. 1988. Differential expression of the ASGM1 antigen  
520 on anti-reovirus and alloreactive cytotoxic T lymphocytes (CTL). *J Immunogenet*, 15, 215-26.
- 521 PIKE, L. J. 2006. Rafts defined: a report on the Keystone Symposium on Lipid Rafts and Cell  
522 Function. *J Lipid Res*, 47, 1597-8.
- 523 SLIFKA, M. K., PAGARIGAN, R. R. & WHITTON, J. L. 2000. NK markers are expressed on a  
524 high percentage of virus-specific CD8+ and CD4+ T cells. *J Immunol*, 164, 2009-15.
- 525 STITZ, L., BAENZIGER, J., PIRCHER, H., HENGARTNER, H. & ZINKERNAGEL, R. M. 1986.  
526 Effect of rabbit anti-asialo GM1 treatment in vivo or with anti-asialo GM1 plus complement  
527 in vitro on cytotoxic T cell activities. *J Immunol*, 136, 4674-80.
- 528 WILTROUT, R. H., SANTONI, A., PETERSON, E. S., KNOTT, D. C., OVERTON, W. R.,  
529 HERBERMAN, R. B. & HOLDEN, H. T. 1985. Reactivity of anti-asialo GM1 serum with  
530 tumoricidal and non-tumoricidal mouse macrophages. *J Leukoc Biol*, 37, 597-614.
- 531
